# Supplementary material for: Green synthesis of silver nanoparticles from Manilkara zapota leaf extract for the detection of aminoglycoside antibiotics and other applications
Source: Royal Society of Chemistry journal article supplement (doi:10.1039/d4ra01906g), 2024-01-01
Supplement: d4ra01906g1.pdf [file d4ra01906g1.pdf]

**Supplementary Information**

**Green Synthesis of Silver Nanoparticles by *Manilkara Zapota* Leaf Extract for  
Detection of Aminoglycoside Antibiotic and its Applications**

**Khushboo Sahu<sup>a</sup>, Ramsingh Kurrey<sup>b\*</sup> and Ajai Kumar Pillai<sup>a\*</sup>**

<sup>a</sup>Govt. V.Y.T. Post Graduate Autonomous College Durg- 491001 Chhattisgarh, India

<sup>b</sup>National Center for Natural Resources, Pt. Ravishankar Shukla University Raipur-492010, Chhattisgarh, India

**\*Corresponding Author:**

Email: [drajaipillai@gmail.com](mailto:drajaipillai@gmail.com) (Ajai Kumar Pillai),

Contact: +917882 393644

### **Figure caption**

**Fig. S1** Selectivity study: determination of AMG class of antibiotic like STR in the presence of other class of antibiotics with green synthesized AgNPs-MZL.

**Fig. S2** Optimization parameters: effect of concentration of AgNPs-MZL (a), effect of pH (b), effect of reaction time (c) and effect of ionic salt (d).

**Fig. S3** Effect of the diverse substances in the presence of the green synthesis AgNPs-MZL and AgNPs-MZL with AMG class of antibiotic for selective determination of STR.

**Fig. S4** Reproducibility curve for determination of STR using green synthesized AgNPs-MZL at 10 ngmL<sup>-1</sup> under the optimized condition.

**Fig. S5** The *in-vitro* antioxidant activity and antibacterial activity of the seed extract of *Manilkara Zapota*, green synthesized AgNPs-MZL and AgNPs-MZL with STR:

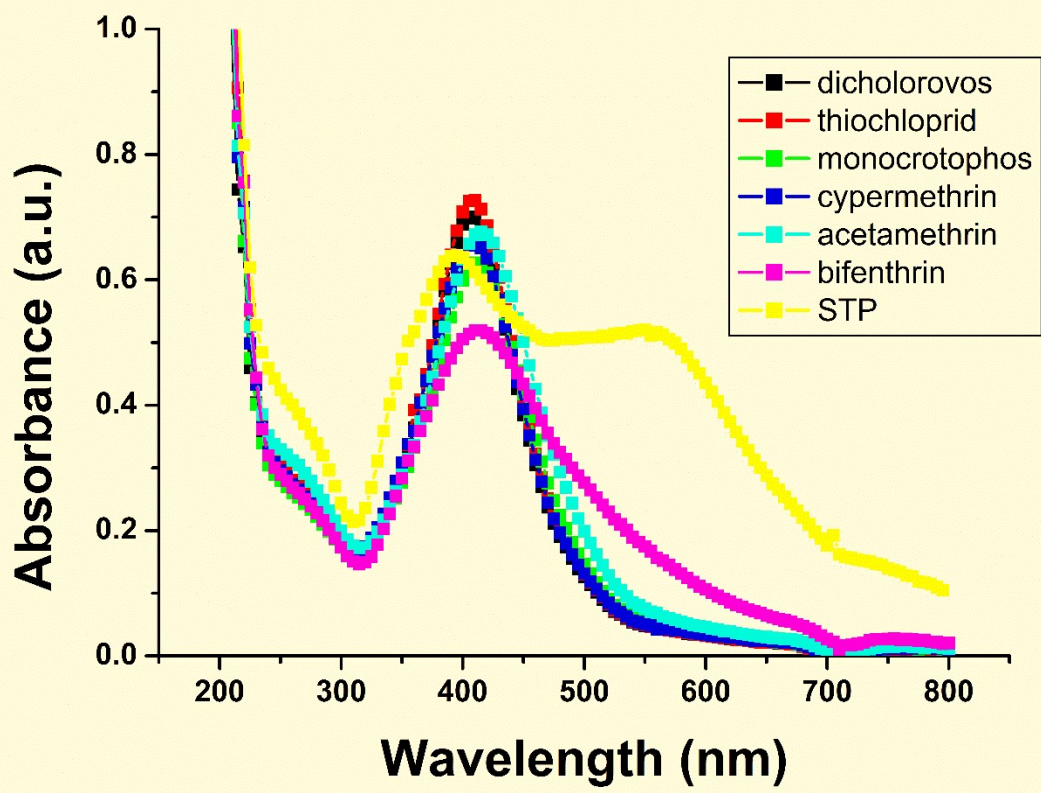

Fig. S1

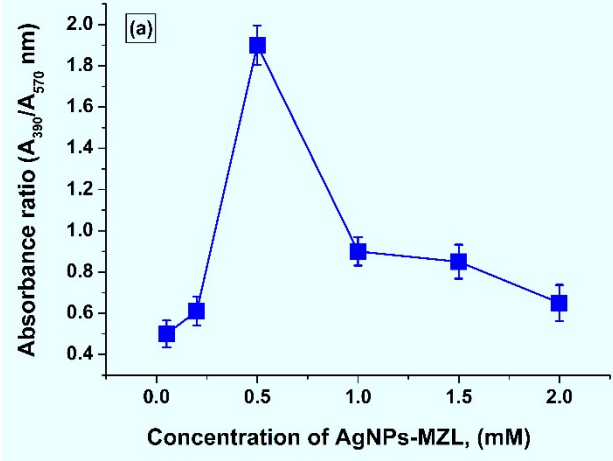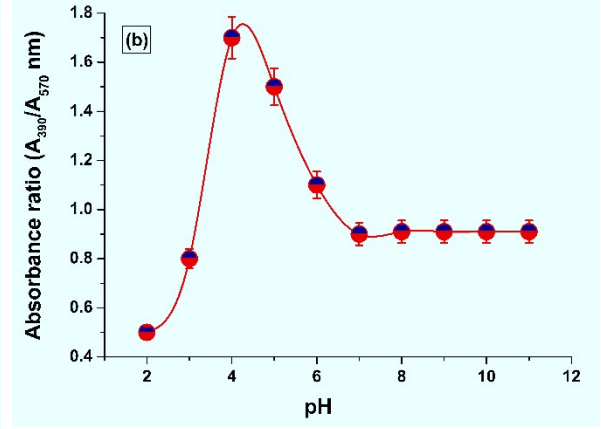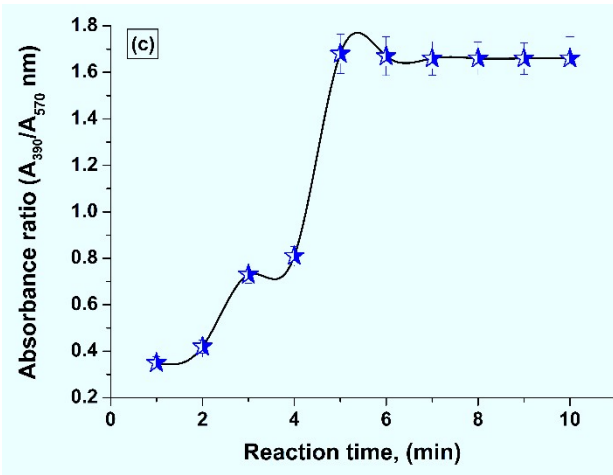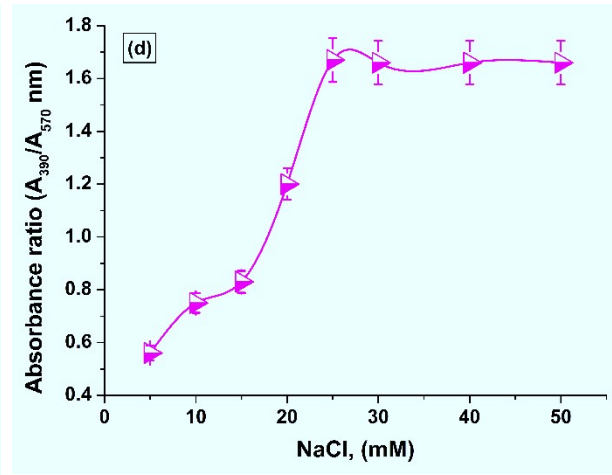

Fig. S2

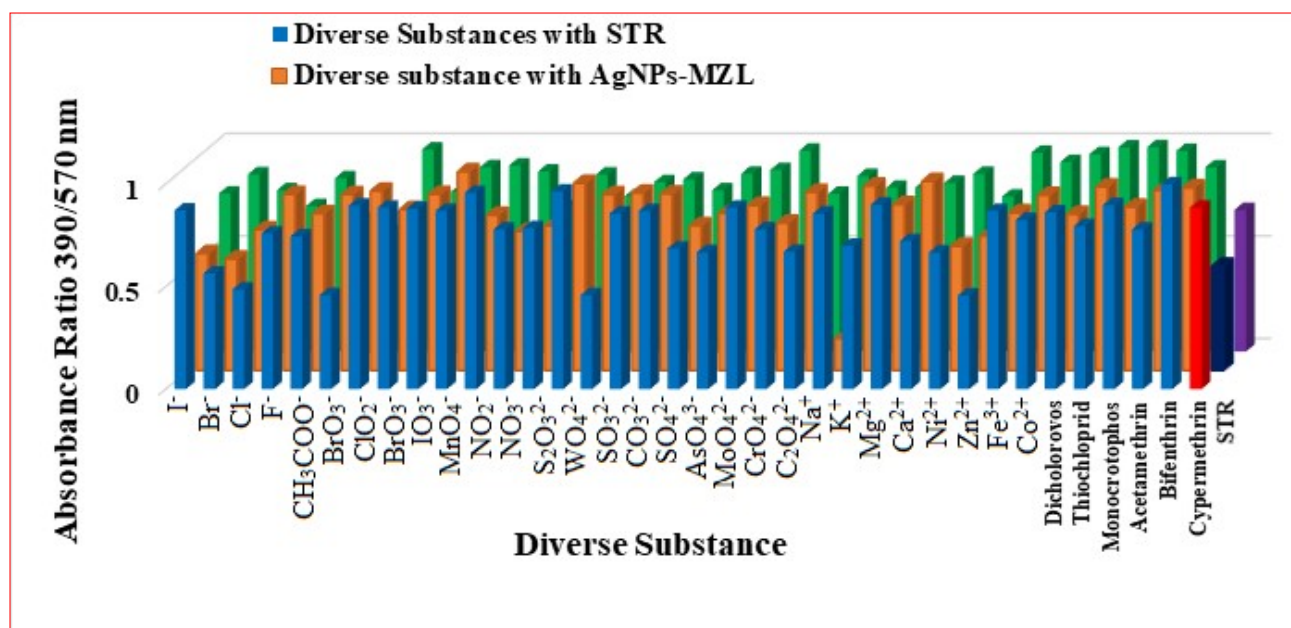

Fig. S3

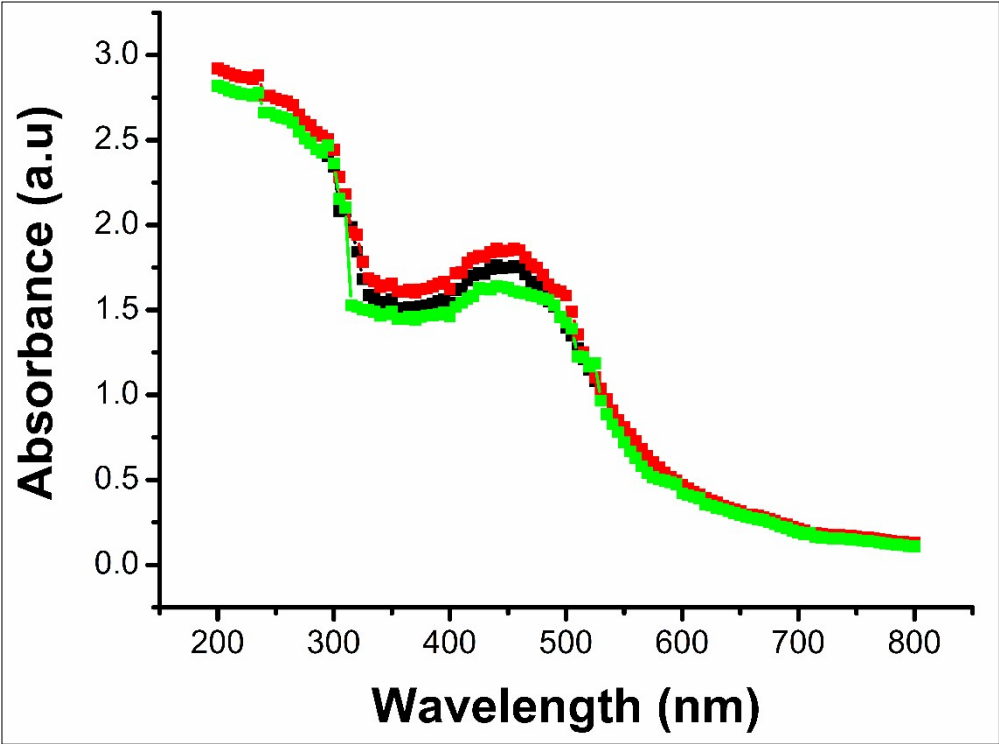

Fig. S4

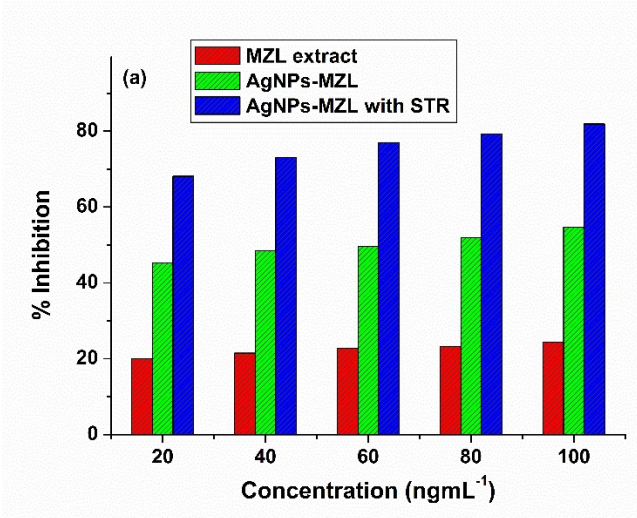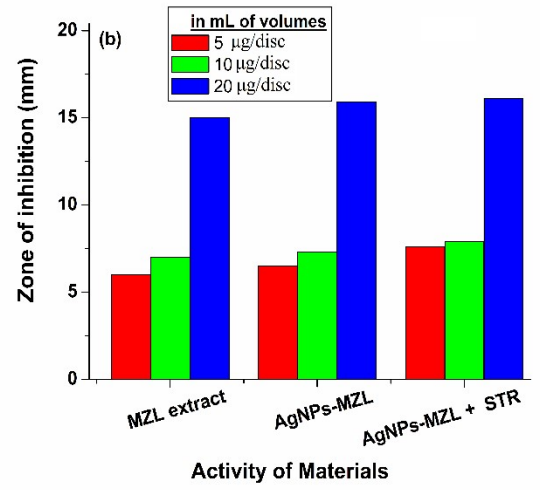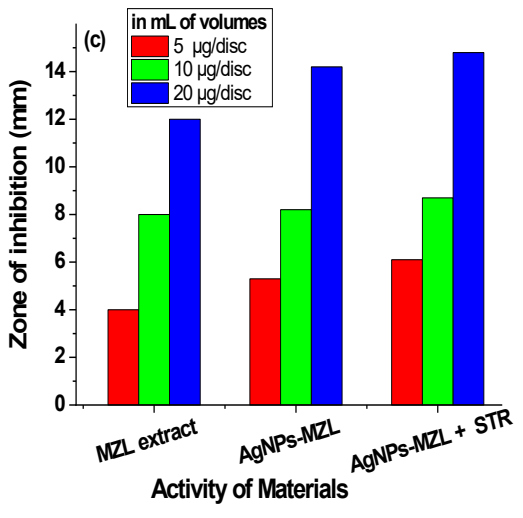

Fig. S5
